# Supplementary material
Source: publisher site journal article supplement (https://www.dovepress.com/get_supplementary_file.php?f=475112.docx)
Supplement: Supplementary file 1 [file get_supplementary_file.php]

**Supplemental Table S1:** Items of the COPD Assessment Test (CAT). Each question is rated on a Likert scale from 0 to 5. The total score is obtained by summation of the 8 items [Jones PW et al. 2009, see main text].

| **#** | **Shortcut** | **Questions: 0 (minimum impact) – 5 (maximum impact)** |
| --- | --- | --- |
| **CAT 1** | Cough | I never cough - I cough at all the time |
| **CAT 2** | Phlegm | I have no phlegm (mucus) – My chest is completely full of phlegm (mucus) |
| **CAT 3** | Chest tightness | My chest does not feel tight at all – My chest feels very tight |
| **CAT 4** | Dyspnea | When I walk up a hill or one flight of stairs, I am not breathless - When I walk up a hill or one flight of stairs, I am very breathless |
| **CAT 5** | Home activity | I am not limited doing any activities at home - I am very limited doing activities at home |
| **CAT 6** | Confidence leaving home | I am confident in leaving my home despite my lung condition – I am not at all confident leaving my home because of my lung condition |
| **CAT 7** | Sleep disturbance | I sleep soundly – I don’t sleep soundly because of my lung condition |
| **CAT 8** | Lack of energy | I have lots of energy – I have no energy at all |

**Supplemental Table S2:** Analyses of the COPD Assessment Test (CAT) single items and total score [Jones PW et al. 2009, see main text] to predict various outcomes. The relationship between death and predictors was determined by Cox proportional hazards; for other binary outcomes, multiple logistic regression analyses were used. OR = Odds ratio, ‘lower’ and ‘upper’ indicate 95% confidence intervals. GOLD = Global Initiative for Chronic Obstructive Lung Disease, KCO = transfer coefficient of the lung for carbon monoxide, CAD = coronary artery disease, HF = heart failure. The CAT total score is obtained by summation of the 8 items. To achieve comparable scales and regression coefficients between the single items and the total score, the total score was divided by 8 for the regression analyses

|  | **Nonsmokers** | | | | **Current smokers** | | | |
| --- | --- | --- | --- | --- | --- | --- | --- | --- |
|  | **OR** | **Lower** | **Upper** | **p value** | **OR** | **Lower** | **Upper** | **p value** |
| **Mortality** |  |  |  |  |  |  |  |  |
| CAT 1 | 0.870 | 0.723 | 1.047 | 0.140 | 1.158 | 0.815 | 1.646 | 0.414 |
| CAT 2 | 1.003 | 0.852 | 1.182 | 0.967 | 0.764 | 0.552 | 1.058 | 0.105 |
| CAT 3 | 0.977 | 0.854 | 1.117 | 0.730 | 0.878 | 0.679 | 1.135 | 0.320 |
| CAT 4 | 1.286 | 1.070 | 1.546 | **0.007** | 1.159 | 0.848 | 1.584 | 0.354 |
| CAT 5 | 1.112 | 0.952 | 1.300 | 0.180 | 1.238 | 0.928 | 1.651 | 0.146 |
| CAT 6 | 1.245 | 1.084 | 1.429 | **0.002** | 1.206 | 0.955 | 1.523 | 0.116 |
| CAT 7 | 0.930 | 0.821 | 1.053 | 0.250 | 0.949 | 0.757 | 1.191 | 0.653 |
| CAT 8 | 1.075 | 0.915 | 1.263 | 0.378 | 0.898 | 0.689 | 1.171 | 0.426 |
| CAT total score | 1.564 | 1.328 | 1.843 | **<0.001** | 1.129 | 0.836 | 1.525 | 0.428 |
|  |  |  |  |  |  |  |  |  |
| **GOLD E** | |  |  |  |  |  |  |  |
| CAT 1 | 1.092 | 0.964 | 1.236 | 0.168 | 0.702 | 0.545 | 0.905 | **0.006** |
| CAT 2 | 1.119 | 1.001 | 1.251 | **0.049** | 1.345 | 1.056 | 1.713 | **0.016** |
| CAT 3 | 1.062 | 0.969 | 1.165 | 0.199 | 1.026 | 0.869 | 1.212 | 0.759 |
| CAT 4 | 0.997 | 0.887 | 1.120 | 0.954 | 1.002 | 0.816 | 1.230 | 0.985 |
| CAT 5 | 1.169 | 1.053 | 1.297 | **0.003** | 1.299 | 1.070 | 1.578 | **0.008** |
| CAT 6 | 1.209 | 1.099 | 1.331 | **<0.001** | 1.049 | 0.887 | 1.240 | 0.579 |
| CAT 7 | 1.139 | 1.049 | 1.237 | **0.002** | 1.261 | 1.091 | 1.459 | **0.002** |
| CAT 8 | 0.982 | 0.879 | 1.098 | 0.754 | 1.042 | 0.860 | 1.264 | 0.672 |
| CAT total score | 2.145 | 1.907 | 2.413 | **<0.001** | 2.008 | 1.630 | 2.472 | **<0.001** |
|  |  |  |  |  |  |  |  |  |
| **KCO < 55 %predicted** | |  |  |  |  |  |  |  |
| CAT 1 | 0.823 | 0.718 | 0.944 | **0.006** | 0.893 | 0.697 | 1.144 | 0.370 |
| CAT 2 | 0.985 | 0.871 | 1.114 | 0.807 | 0.923 | 0.733 | 1.160 | 0.491 |
| CAT 3 | 0.822 | 0.743 | 0.910 | **<0.001** | 0.776 | 0.655 | 0.919 | **0.003** |
| CAT 4 | 1.516 | 1.330 | 1.728 | **<0.001** | 1.349 | 1.097 | 1.659 | **0.005** |
| CAT 5 | 1.302 | 1.163 | 1.457 | **<0.001** | 1.490 | 1.225 | 1.813 | **<0.001** |
| CAT 6 | 1.312 | 1.181 | 1.459 | **<0.001** | 1.115 | 0.940 | 1.323 | 0.212 |
| CAT 7 | 0.878 | 0.801 | 0.963 | **0.006** | 0.973 | 0.841 | 1.124 | 0.707 |
| CAT 8 | 0.990 | 0.879 | 1.116 | 0.872 | 0.816 | 0.676 | 0.986 | **0.035** |
| CAT total score | 1.521 | 1.355 | 1.708 | **<0.001** | 1.209 | 0.999 | 1.462 | 0.051 |

| **Table S2 continued** | | | | | | | | |
| --- | --- | --- | --- | --- | --- | --- | --- | --- |
|  | **Nonsmokers** | | | | **Current smokers** | | | |
|  | **OR** | **Lower** | **Upper** | **p value** | **OR** | **Lower** | **Upper** | **p value** |
| **Asthma** |  |  |  |  |  |  |  |  |
| CAT 1 | 1.008 | 0.872 | 1.165 | 0.917 | 1.019 | 0.749 | 1.387 | 0.903 |
| CAT 2 | 1.176 | 1.032 | 1.340 | **0.015** | 0.951 | 0.710 | 1.274 | 0.738 |
| CAT 3 | 1.198 | 1.073 | 1.337 | **0.001** | 1.162 | 0.943 | 1.433 | 0.158 |
| CAT 4 | 0.927 | 0.811 | 1.061 | 0.271 | 0.996 | 0.772 | 1.286 | 0.978 |
| CAT 5 | 0.940 | 0.831 | 1.062 | 0.319 | 1.114 | 0.876 | 1.418 | 0.379 |
| CAT 6 | 0.983 | 0.876 | 1.102 | 0.766 | 0.977 | 0.793 | 1.205 | 0.829 |
| CAT 7 | 1.125 | 1.022 | 1.239 | **0.016** | 1.137 | 0.947 | 1.366 | 0.169 |
| CAT 8 | 0.970 | 0.852 | 1.105 | 0.649 | 0.908 | 0.714 | 1.154 | 0.430 |
| CAT total score | 1.322 | 1.163 | 1.504 | **<0.001** | 1.343 | 1.047 | 1.723 | **0.020** |
|  |  |  |  |  |  |  |  |  |
| **CAD/HF** | |  |  |  |  |  |  |  |
| CAT 1 | 0.999 | 0.859 | 1.161 | 0.987 | 0.715 | 0.528 | 0.969 | **0.030** |
| CAT 2 | 1.045 | 0.915 | 1.194 | 0.513 | 1.044 | 0.789 | 1.381 | 0.764 |
| CAT 3 | 1.138 | 1.017 | 1.272 | **0.024** | 1.046 | 0.855 | 1.280 | 0.660 |
| CAT 4 | 1.016 | 0.883 | 1.171 | 0.821 | 1.112 | 0.864 | 1.429 | 0.410 |
| CAT 5 | 1.136 | 1.002 | 1.288 | **0.047** | 1.243 | 0.988 | 1.565 | 0.064 |
| CAT 6 | 1.038 | 0.925 | 1.165 | 0.526 | 0.867 | 0.699 | 1.077 | 0.197 |
| CAT 7 | 0.944 | 0.853 | 1.044 | 0.259 | 1.217 | 1.022 | 1.449 | **0.028** |
| CAT 8 | 1.090 | 0.951 | 1.248 | 0.216 | 1.063 | 0.845 | 1.337 | 0.602 |
| CAT total score | 1.505 | 1.317 | 1.720 | **<0.001** | 1.404 | 1.104 | 1.786 | **0.006** |
|  |  |  |  |  |  |  |  |  |
| **Osteoporosis** | |  |  |  |  |  |  |  |
| CAT 1 | 0.922 | 0.784 | 1.084 | 0.325 | 1.137 | 0.819 | 1.579 | 0.444 |
| CAT 2 | 0.999 | 0.863 | 1.156 | 0.988 | 0.964 | 0.708 | 1.313 | 0.815 |
| CAT 3 | 1.091 | 0.968 | 1.230 | 0.154 | 1.007 | 0.801 | 1.266 | 0.953 |
| CAT 4 | 1.077 | 0.919 | 1.261 | 0.359 | 0.959 | 0.728 | 1.262 | 0.764 |
| CAT 5 | 1.142 | 0.995 | 1.311 | 0.060 | 1.017 | 0.776 | 1.332 | 0.903 |
| CAT 6 | 1.086 | 0.962 | 1.226 | 0.183 | 1.164 | 0.935 | 1.449 | 0.175 |
| CAT 7 | 1.139 | 1.022 | 1.271 | **0.019** | 1.063 | 0.874 | 1.293 | 0.541 |
| CAT 8 | 0.937 | 0.811 | 1.083 | 0.380 | 1.070 | 0.827 | 1.385 | 0.604 |
| CAT total score | 1.538 | 1.330 | 1.778 | **<0.001** | 1.420 | 1.081 | 1.867 | **0.012** |
